# **Proteome-wide prediction of bacterial carbohydrate-binding proteins as a tool for understanding commensal and pathogen colonisation of the vaginal microbiome**

1

2 **François Bonnardel<sup>1,2,3</sup>, Stuart M. Haslam<sup>4,5</sup>, Anne Dell<sup>4,5</sup>, Ten Feizi<sup>5,6</sup>, Yan Liu<sup>5,6</sup>, Virginia Tajadura-**  
3 **Ortega<sup>5,6</sup>, Yukie Akune<sup>6</sup>, Lynne Sykes<sup>5,7,8</sup>, Phillip R. Bennett<sup>5,7,8,9</sup>, David A. MacIntyre<sup>5,7,9\*</sup>, Frédérique**  
4 **Lisacek<sup>2,3,10\*</sup> and Anne Imberty<sup>1\*</sup>**

5

6 <sup>1</sup> University Grenoble Alpes, CNRS, CERMAV, Grenoble, France

7 <sup>2</sup>Swiss Institute of Bioinformatics, Geneva, Switzerland

8 <sup>3</sup>Computer Science Department, UniGe, Geneva, Switzerland

9 <sup>4</sup>Department of Life Sciences, Imperial College London, London, UK

10 <sup>5</sup>March of Dimes European Prematurity Research Centre, Imperial College London, UK

11 <sup>6</sup>Glycosciences Laboratory, Department of Metabolism Digestion and Reproduction, Imperial College  
12 London, London, UK

13 <sup>7</sup>Imperial College Parturition Research Group, Division of the Institute of Reproductive and Developmental  
14 Biology, Department of Metabolism Digestion and Reproduction, Imperial College London, London, UK

15 <sup>8</sup>Queen Charlotte's Hospital, Imperial College Healthcare NHS Trust, London, UK

16 <sup>9</sup>Tommy's National Centre for Miscarriage Research, Imperial College London, London, UK

17 <sup>10</sup>Section of Biology, UniGe, Geneva, Switzerland

18

19 \*Corresponding Authors:

20 Email : [d.macintyre@imperial.ac.uk](mailto:d.macintyre@imperial.ac.uk), [frederique.lisacek@sib.swiss](mailto:frederique.lisacek@sib.swiss), [anne.imberty@cermav.cnrs.fr](mailto:anne.imberty@cermav.cnrs.fr)

21

22 **Keywords : Lectins, glycans, vaginal microbiota, pregnancy, infection, bioinformatics**

23

## Exploring the vaginal lectome

### 24 **Abstract**

25 Lectins, such as adhesins and toxins, are carbohydrate-binding proteins that recognise glycans of cells and their  
26 secretions. While mediation of microbe-microbe and microbe-host interactions by lectins has long been  
27 recognised in the lung and gut, little is known about those in the vagina, where such interactions are implicated  
28 in health and various disease states. These include sexually transmitted infections, cervical cancer and poor  
29 pregnancy outcomes such as preterm birth. In this study, the curated UniLectin3D database was used to establish  
30 a lectin classification based primarily on taxonomy and protein 3D structure. The resulting 109 lectin classes  
31 were characterised by specific Hidden Markov Model (HMM) profiles. Screening of microbial genomes in the  
32 UniProt and NCBI NR sequence databases resulted in identification of >100 000 predicted bacterial lectins  
33 available at [unilectin.eu/bacteria](http://unilectin.eu/bacteria). Screening of the complete genomes of 90 isolates from 21 vaginal bacterial  
34 species showed that the predicted lectomes (ensemble of predicted lectins) of *Lactobacilli* associated with  
35 vaginal health are substantially less diverse than those of pathogens and pathobionts. Both the number of  
36 predicted bacterial lectins, and their specificities for carbohydrates correlated with pathogenicity. This study  
37 provides new insights into potential mechanisms of commensal and pathogen colonisation of the reproductive  
38 tract that underpin health and disease states.

39

40

### 41 **Author Summary**

42 Microbes play an important role in human health and disease. Bacteria use protein receptors called lectins to  
43 anchor to specific sugars (i.e. glycans) decorating the surface of proteins and cells. While these have been  
44 extensively studied in the mouth and gut, much less is known about how bacteria attach and colonise the lower  
45 female reproductive tract. This limits our understanding of how they contribute to sexually transmitted  
46 infections, cervical cancer and preterm birth. To address this, we designed and implemented a bioinformatics  
47 workflow to identify and classify novel lectins in 21 vaginal bacterial species implicated in reproductive tract  
48 health and disease. Our results show that species associated with infection and inflammation produce a larger  
49 variety of lectins thus enabling them to potentially bind a wider array of glycans in the vagina. These findings  
50 provide new targets for the development of compounds designed to prevent pathogen colonisation or encourage  
51 growth of commensal species.

52

## Exploring the vaginal lectome

### 53 **Introduction**

54 Microbiota-host interactions within different ecological niches of the human body are critical  
55 determinants of health and disease states [1]. At mucosal surface interfaces, microbial and host cells,  
56 as well as non-cellular components of the mucosa, present an exceptionally complex array of  
57 attachment and recognition sites for microbiota, many of which are carbohydrate sequences displayed  
58 on extensively glycosylated mucin-type glycoproteins rich in O-glycans. The diverse populations of  
59 glycans provide recognition sites for microbial adhesins that have the ability to distinguish the various  
60 motifs displayed. Bacteria also produce glycosylhydrolases and other enzymes that facilitate the use of  
61 secreted mucins as primary carbon sources for energy metabolism [2, 3]. The abilities of microbes to  
62 specifically recognise, attach and adhere to cellular and non-cellular surfaces are thus key aspects of  
63 commensal and pathogenic colonisation and are mediated by receptors, such as lectins and  
64 carbohydrate-binding modules (CBMs) [3-6].

65 Lectins are ubiquitous proteins of non-immune origin that bind to a variety of carbohydrates without  
66 modifying them [7]. Through their interactions with glycoproteins and glycolipids via the  
67 oligosaccharides, lectins play crucial roles in cell-cell communication, signalling pathways and  
68 immune responses [8]. Bacterial lectins may be incorporated into multiprotein organelles, such as  
69 fimbriae (pili) or flagellae and participate in the mediation of host recognition and adhesion [9]. In  
70 pathogenic species, lectins may also be toxin subunits targeting a toxic catalytic unit towards  
71 subcellular components that display specific glycoconjugates [10]. Soluble lectins are also expressed  
72 as virulence factors by opportunistic bacteria [11] and can alter dynamics of glycolipids to induce the  
73 internalization of whole bacteria into host cells [12]. Bacterial lectins have also been shown to directly  
74 impair immune signalling and repair pathways and are implicated in the formation of biofilms [13].

75 The role of lectins and their ligands in shaping microbial niches within the human body is increasingly  
76 recognised, particularly at mucosal interfaces including the gut [3, 14, 15] and oral cavity [16].  
77 However, much less is known about the role of lectins in shaping microbial niches in the lower female  
78 reproductive tract, which play a key role in shaping health and disease throughout a woman's life span  
79 [17]. Colonisation in the vagina by *Lactobacillus* species has been consistently considered a hallmark  
80 of health [18, 19], whereas *Lactobacillus* depletion, high diversity vaginal microbiomes enriched for  
81 potential pathogens are characteristic of bacterial vaginosis and are associated with increased risk of  
82 sexually transmitted infections (STIs) acquisition [20, 21], progression of cervical cancer [22] and  
83 adverse pregnancy outcomes such as miscarriage and preterm birth [23-26]. A key component of the  
84 vaginal mucosa are highly glycosylated mucins that are derived from the mucin-secreting glands of the

## Exploring the vaginal lectome

85 cervix [27]. Alteration of terminal glycan residues by microbially secreted sialidases and sulphatases  
86 modulate the physical and immunological properties of the vaginal mucosa [28]. Vaginal pathogens  
87 such as *Gardnerella vaginalis*, *Trichomonas vaginalis*, *Prevotella* and *Ureaplasma* species are capable  
88 of degrading secretory IgA [29-32]. Moreover, specific strains of *Streptococcus agalactiae* (group B  
89 streptococcus) secrete hyaluronidases that degrade cervical hyaluronic acid into disaccharide  
90 fragments dampening host immune activation through inhibition of Toll-like receptors, which may  
91 contribute to preterm birth via ascending infection [33]. *Streptococcus agalactiae* can also implement  
92 a negative signalling mechanism known as sialoglycan mimicry to evade detection and phagocytosis  
93 by neutrophils; this is through recognition of terminal  $\alpha$ 2-3-linked sialic acids on the bacteria as ‘self’  
94 glycans by the neutrophil lectin Siglec-9 [34].

95 Despite their important role in infection and pathogenicity, the contribution of bacterial lectins to health  
96 and disease states is yet to be fully appreciated. This is partly due to the limited annotation and  
97 characterisation of the lectins in protein and proteome databases, that precludes predictions of the  
98 diversity, structure and function of the lectins. In recent years, this has begun to be addressed through  
99 the development of databases for structural and functional glycobiology [35, 36]. Among these,  
100 UniLectin3D provides 3D structures of more than 2500 lectins and their complexes with carbohydrates  
101 [37] and sites within UniLectin, a platform dedicated to the curation and collection of lectin knowledge.  
102 In this study we describe how manual selection of lectin domains in 3D structures permits the  
103 identification of lectin classes characterised by fold similarity and minimum thresholds of sequence  
104 identity. We show that defined amino acid sequence motifs and profiles characterising each lectin class  
105 can be used to screen proteomes and translated genomes to identify unannotated lectins. Comparison  
106 of these lectins across different vaginal microbiota strains provides new insights into the potential  
107 mechanisms by which commensal and pathogen colonisation associate with physiological and  
108 pathological conditions in the lower reproductive tract.

## Exploring the vaginal lectome

### 109 Results

#### 110 Structural classification of bacterial lectins in Unilectin3D

111 Structural classification of known lectins curated in the Unilectin3D database  
 112 ([www.unilectin.eu/unilectin3D/](http://www.unilectin.eu/unilectin3D/)) was first performed on the basis of differences in fold, i.e. structure  
 113 of the protein backbone and then on amino acid sequences at 20% of sequence similarity for lectin  
 114 classes and at 70% of sequence similarity for lectin families. This led to the identification of 35  
 115 different folds and 109 lectin classes (S1 Table) derived from a total of 2483 structural lectin entries  
 116 that primarily originated from plant and animal sources. However, bacterial lectins from 46 different  
 117 species accounted for approximately 20% of database entries (495/2483), which were distributed  
 118 among 19 different folds (Figure 1) and 37 classes (S1 Table).

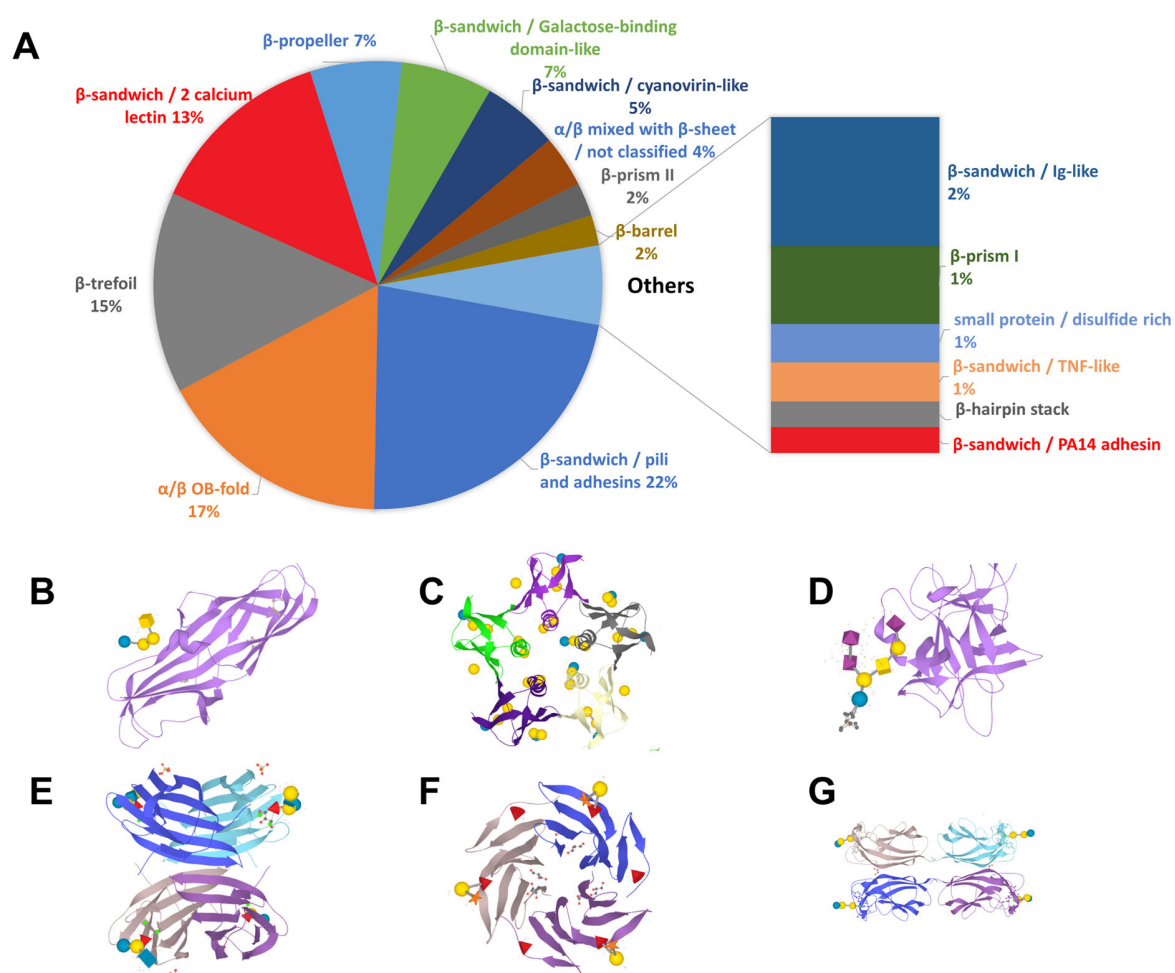

119

120 **Figure 1: Structural classification of bacterial lectins.** (A) Distribution of bacterial lectin folds  
 121 derived from the UniLectin3D database. From the analysis of fold distribution of bacterial lectin crystal

## Exploring the vaginal lectome

122 structures, the six most frequent fold are represented: (B) Pili and adhesins: 1J8R PapG *Escherichia*  
123 *coli*, (C) OB fold: 1BOS SLT-1 / STX-1 *E. coli*, (D)  $\beta$ -trefoil: 1FV2 TeNT *Clostridium tetani*, (E) 2  
124 calcium lectin: 1W8F LecB / PA-III, RSIII *Pseudomonas aeruginosa*, (F)  $\beta$ -propeller: 2BS6 RSL,  
125 BambL *Ralstonia solanacearum*, and (G) Galactose binding domain-like: 2VXJ LecA / PA-IL  
126 *Pseudomonas aeruginosa*. 3D structures were generated using LiteMol [38] with monosaccharides in  
127 binding sites represented using Symbol Nomenclature for Glycans (SNFG) [39].

128

129 The analysis of fold distribution in bacterial lectin crystal structures showed an over-representation of  
130  $\beta$ -sheet containing folds, which were common to adhesins and toxins including previously described  
131 pili adhesins, such as FimH in uro-pathogenic *Escherichia coli*, the oligomer-binding (OB) fold of  
132 the cholera toxin binding domain, the  $\beta$ -sandwich of LecA and LecB in *Pseudomonas aeruginosa*  
133 and the  $\beta$ -trefoil of the recognition domain in clostridial neurotoxins. While the majority of lectin  
134 folds were shared between sources of origin, classes of pili adhesins and AB<sub>5</sub> toxins were found to be  
135 specific to bacteria.

136

### 137 Prediction of lectin sequences from bacterial proteomes

138 Alignment of amino acid sequences in each of the 109 identified lectin classes led to the identification  
139 of 109 characteristic motifs of conserved residues. Profiles characterising each lectin class were  
140 generated with Hidden Markov Models (HMM), which were subsequently used to screen 130 million  
141 bacterial protein sequences from the UniProt database and over 168 million bacterial protein sequences  
142 from the NCBI RefSeq database derived from over 100 000 bacterial species. The TIM fold (named  
143 after triosephosphate isomerase) and Variable Lymphocyte Receptor folds are highly frequent in the  
144 resulting predictions. The TIM lectin class may arise from its high occurrence in hydrolases.  
145 Consequently, both of these lectin classes were excluded from whole proteome predictions. This  
146 resulted in the selection of 100 671 sequences as putative lectins in 10126 distinct bacterial species  
147 (reduced to 46 322 sequences in 6 425 distinct bacterial species when applying a score of 0.25). A web  
148 interface dedicated to the exploration of these bacterial lectin candidates is available at  
149 [www.unilectin.eu/bacteria/](http://www.unilectin.eu/bacteria/).

150

151

## Exploring the vaginal lectome

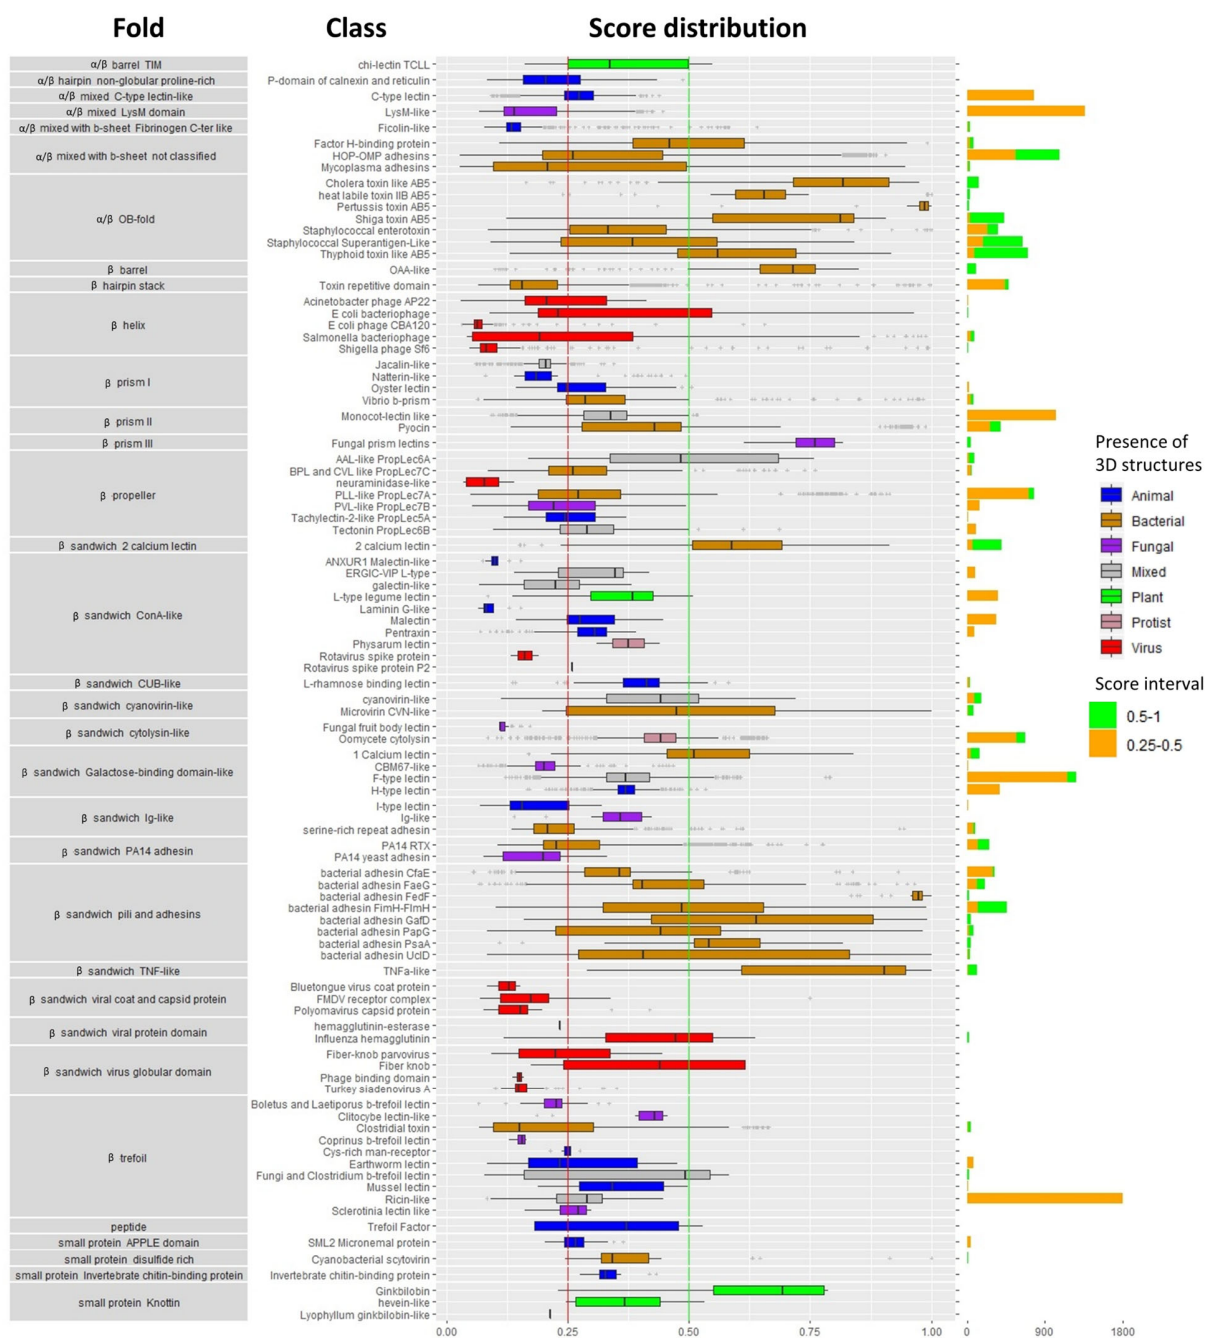

152

153 **Figure 2: Distribution of structural fold-types within predicted lectin classes derived from 21**  
 154 **different bacterial genomes.** Distributions of the predicted lectin classes are presented as horizontal  
 155 box and whisker plots coloured on the basis of genome origin. The whisker plot represents the  
 156 minimum, maximum, median, first quartile and third quartile in each class. Values approaching 1 are  
 157 indicative of high sequence similarity to the reference motif. The predicted lectins in [0.25-0.5] and  
 158 [0.5-1] score intervals are presented as bar graphs. The total number of predicted lectins in each class  
 159 is listed in S1 Table.

## Exploring the vaginal lectome

160

161 Although 481 3D-structures of bacterial lectins were categorized into 37 classes, the screening results  
162 indicated that the putative lectins are predicted to occur in 97 out of the 107 identified classes (with a  
163 cutoff of 25% of sequence similarity with the reference) (S1 Table). Putative lectin sequences identified  
164 in each class, together with the distribution of the prediction scores to the original HMM motif, are  
165 presented in Figure 2. The fold distribution of predicted lectins differed from that obtained when using  
166 3D structures generated from the UniLectin3D database with several classes comparatively over-  
167 represented, including the Ricin-like ( $\beta$  trefoil), the LysM domains (LysM fold), and the F-type lectins  
168 ( $\beta$  sandwich galactose binding domain like) (S1 Table). Each lectin domain is predicted by selecting  
169 the best fitted HMM. A score reflecting the sequence similarity is computed as the difference between  
170 the predicted lectin domain and the reference conserved motif. Lectins with the highest prediction  
171 scores per class were, as expected, of bacterial origin and included adhesins, AB5 toxins and calcium-  
172 dependent soluble lectins. However, the  $\beta$ -prism III fungal lectin was also found to have a high  
173 prediction score indicative of genetic exchange between bacteria and fungi. The majority of low  
174 scoring predictions ( $<0.25$ ) reflective of low sequence similarity, were identified in viruses with the  
175 exception of the Influenza hemagglutinin, which contains a high abundance of sequences for the  
176 characteristic domain although not all are carbohydrate-binding. Lectins with mid-range (0.25-0.5)  
177 prediction scores were evenly distributed across multiple genome sources.

178

### 179 **Identification and characterisation of vaginal microbiota lectins**

180 We next obtained publicly available genome data for 90 vaginal bacterial strains classified on the basis  
181 of potential pathogenicity within the vaginal niche and having a known association with states of health  
182 or disease (S2 Table). Comparison of the lectomes, i.e. the predicted ensemble of lectins, highlighted  
183 major differences across species with pathobionts generally harbouring a higher diversity of lectin  
184 classes compared to commensals (Figure 3). Considering the low number of identified lectins, the TIM  
185 lectin and the Variable lymphocyte receptor classes were kept, despite a low probability of lectin  
186 activity. For example, the only predicted lectin consistently identified across *L. crispatus* isolates was  
187 LysM, a common domain involved in cell wall attachment in many different bacteria. Consistent with  
188 this, the LysM domain was predicted from the majority of examined vaginal microbial genomes but  
189 interestingly, was absent from *L. iners* and most *Prevotella* strains.

190



## Exploring the vaginal lectome

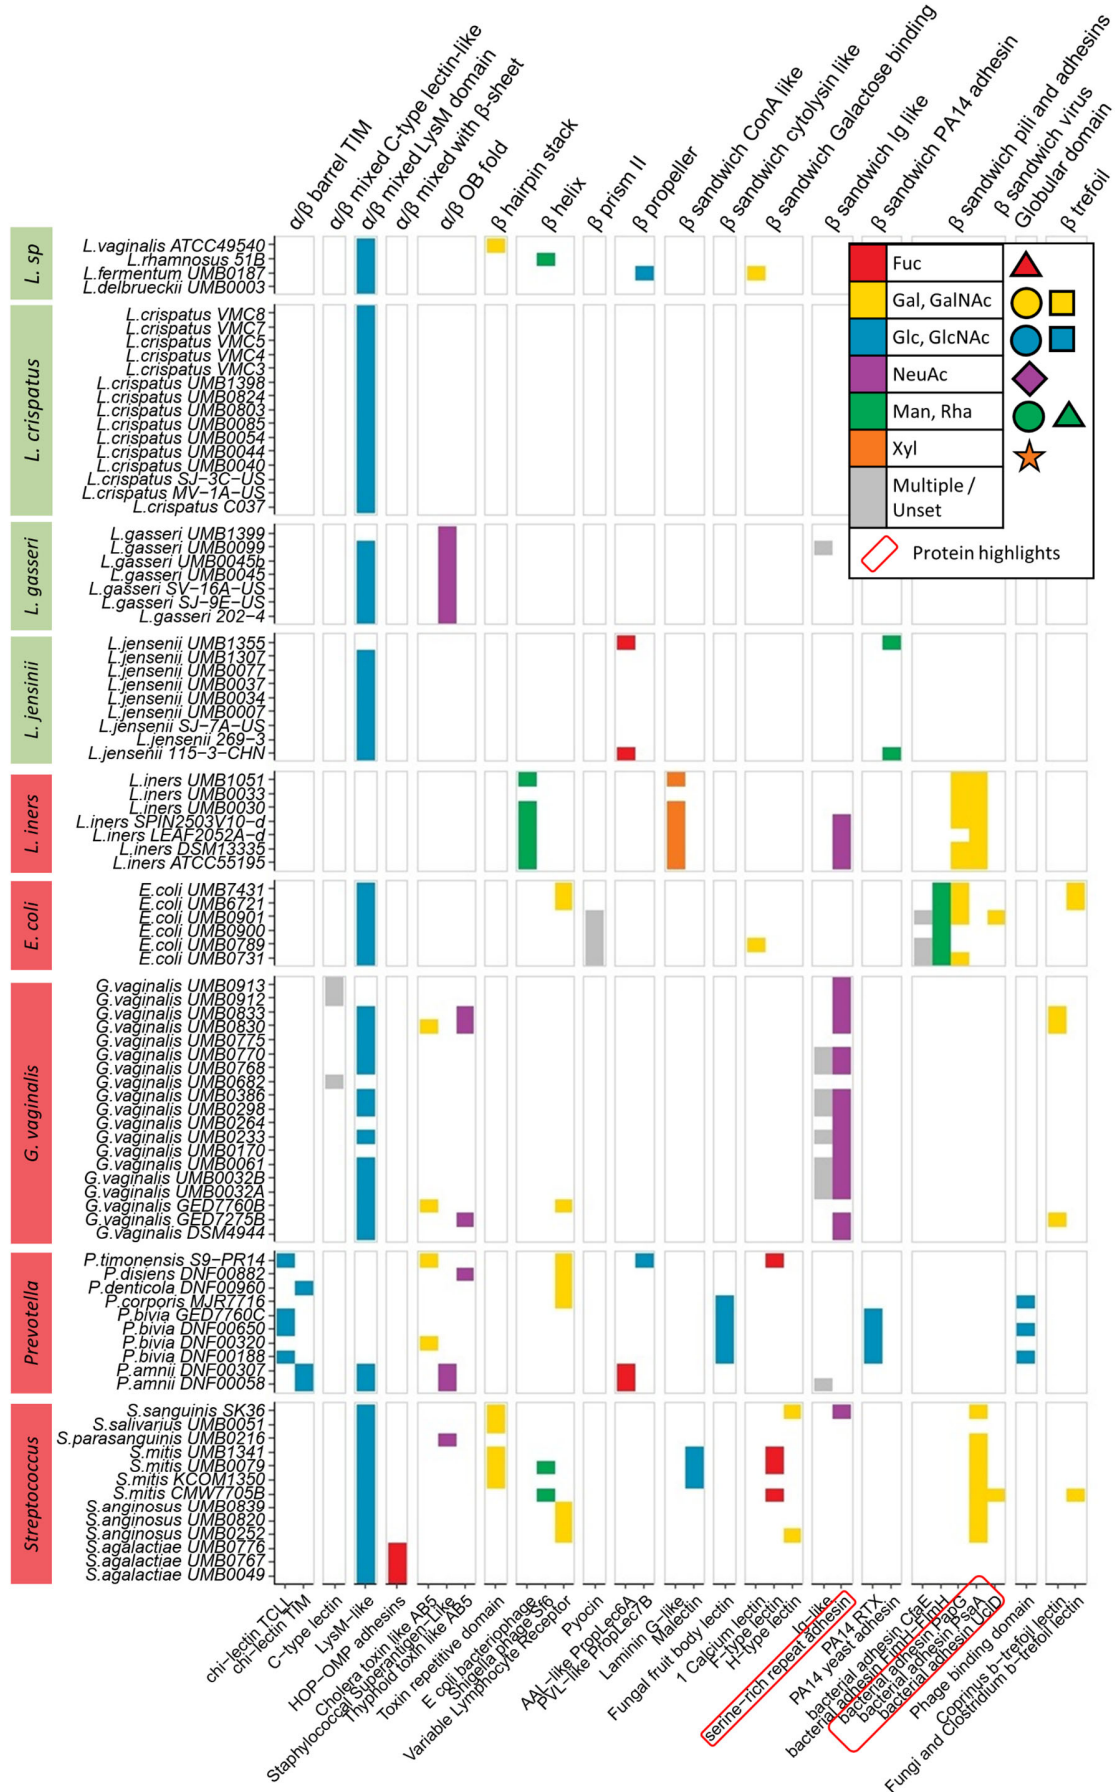

## Exploring the vaginal lectome

192 **Figure 3. Heatmap of predicted lectomes from different vaginal commensal and pathobiont**  
193 **bacterial species classified by fold and class.** Green species label represent commensal species and  
194 red species labels represent pathobiont species. Colours within each class of lectin reflects its main  
195 glycan specificity characterised by binding monosaccharides using standardised Symbol Nomenclature  
196 for Glycans (SNFG) (<https://www.ncbi.nlm.nih.gov/glycans/snfg.html>). The lectin class circled in red  
197 are further discussed in the results due to their particular presence in *L.iners*.

198

199 Predicted lectins of *L. iners* could be mapped to five different classes: *E.coli* bacteriophage  $\beta$ -helix,  
200 laminin G-like, adhesin domain of two type 1 pili PapG and PsaA (chaperon-usher-assembled, CUP)  
201 and the adhesin domain of serine rich repeat protein (SRRP), which was also prominently observed in  
202 *G. vaginalis* species and in a *Streptococcus sanguinis* strain. Up to 10 different lectin classes were  
203 predicted from other *Streptococcus* species although *S. agalactiae* (also known as Group B  
204 Streptococcus), which is a pathogen known to cause sepsis, pneumonia and meningitis in newborn  
205 babies, was the only vaginal species predicted to produce Outer Membrane Protein (OMP) adhesins.

206

### 207 **Identification and characterisation of vaginal microbiota carbohydrate binding modules**

208 The screening strategy was extended to the prediction of carbohydrate binding modules (CBMs), small  
209 domains that are generally associated with carbohydrate modifying enzymes, often involved in  
210 microbial digestion of mucin glycans. A few of particular interest including CBM34, CBM41 and  
211 CBM48, which are specific for glucose containing polysaccharides (e.g. amylose, glycogen) and  
212 generally act as binding modules for amylases and related enzymes, were predicted consistently across  
213 almost all vaginal species (Figure 4).

214 While the majority of CBMs have been characterised as enzyme-associated domains in plant  
215 polysaccharides, two human-specific CBMs were observed in the dataset (S3 Table). The first is  
216 CBM40 considered as sialic acid-specific since it has been identified in association with a bacterial  
217 sialidase [40]. In the dataset analysed here, it is predicted to occur only in *L. iners* pathobiont species,  
218 *S. mitis* and some *Prevotella* species. Considering the earlier observation regarding the predicted SRR  
219 adhesin domain, the sialic acid binding ability appears to correlate mainly with lectins and CBMs  
220 present in the lectomes of pathobiont bacteria. The second domain of interest is CBM47, shown to be  
221 fucose-specific in the lectin regulatory domain of a cholesterol-dependent cytolysin present in some *S.*  
222 *mitis* strains (Feil, Lawrence et al. 2012). It shares structure and sequence similarity with the F-lectins

## Exploring the vaginal lectome

223 from fishes [41]. In our study, this fucose-binding module is identified in *S. mitis* as well as in some  
 224 pathobionts, i.e. *Prevotella* and *L. iners*. Furthermore, the *L. iners* lectome contained two predicted  
 225 adhesins, PapG and PsaA, as well as CBM60, which bind to galactose epitope occurring on human  
 226 Gb3 gangliosides [42].  
 227

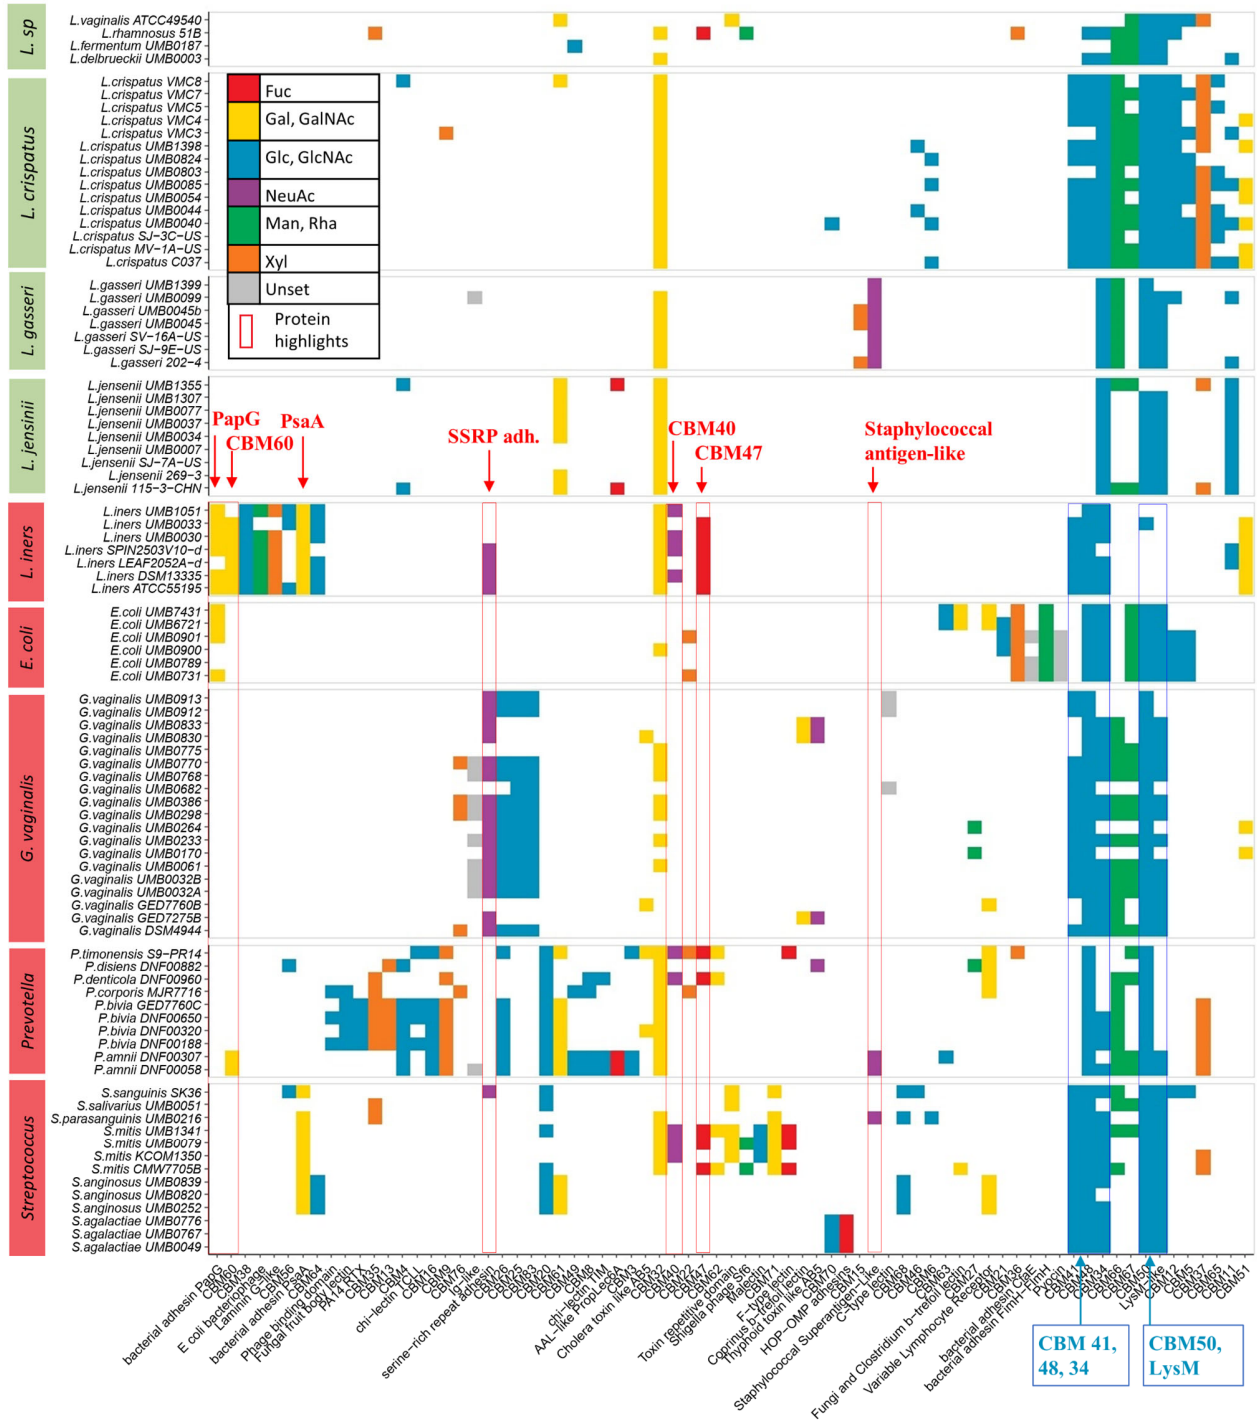

228

## Exploring the vaginal lectome

229 **Figure 4. Heatmap of predicted lectin and CBM domains from different vaginal commensal and**  
 230 **pathobiont bacterial species arranged by domain composition similarity.** Colours within each class  
 231 of lectin reflect its main glycan specificity (SNFG nomenclature). The domains highlighted are further  
 232 discussed in the results due to their particular presence in *L. iners*. The addition of the CBM domains  
 233 strengthens the distinction between commensal and pathobiont bacteria.

234  
 235 Further comparison of the predicted lectin and CBM profiles of vaginal commensals and pathobionts  
 236 were obtained by performing unsupervised hierarchical clustering on a Euclidean distance matrix of  
 237 the number of proteins per species for each lectin and CBM domain (Figure 5). The resulting  
 238 hierarchical radial plot using predicted lectins only, showed a clear clustering of the majority of  
 239 *Lactobacillus* species, with further sub-clustering at species level observable, with the exception of  
 240 *L.iners* strains, which clustered more closely with other pathobiont species including *Prevotella* and  
 241 *Streptococcus* species. *G.vaginalis* also did not cluster in a single group. The inclusion of predicted  
 242 CBMs in the clustering led to improved discrimination between commensal and pathobiont species  
 243 and led to species-specific clustering of the majority of isolates.

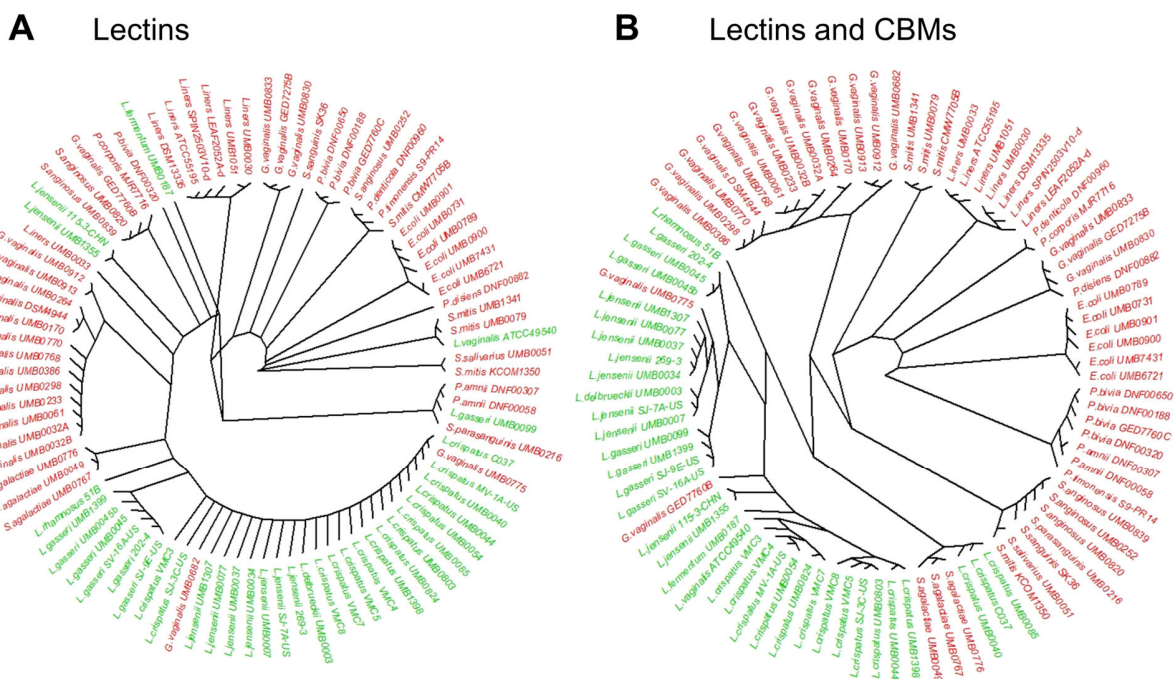

244  
 245 **Figure 5. Hierarchical radial tree of (A) predicted lectin classes only or (B) lectin classes and**  
 246 **predicted CBMs in vaginal commensal (green) and pathobiont (red) bacteria.** LysM and CBM50  
 247 are excluded from the dataset to generate the hierarchical radial tree. While the majority of

## Exploring the vaginal lectome

248 *Lactobacillus* species clustered closely to each other, indicating similar putative lectomes, the lectome  
249 of *L.iners* isolates more closely resembled that of pathobionts

250

251

### 252 **Discussion**

253 The contribution of bacterial lectins to health and disease remains poorly understood. This is in part  
254 because their structural and functional complexity and the limited annotation of bacterial lectins in  
255 protein and proteome databases has prevented the development of predictive models of structure,  
256 diversity and function. Here, we begin to address this through manual selection of lectin domains in  
257 3D structures obtained from the recently curated Unilectin3D database, followed by the prediction of  
258 lectin classes based upon fold similarity and minimum thresholds of sequence identity. This strategy  
259 led to the identification of more than 35 different structural folds and 109 predicted lectin classes, of  
260 which 19 folds and 37 classes were of bacterial origin. These were particularly rich in  $\beta$ -sheet  
261 containing folds, which have previously been recognised as key structural characteristics of lectins  
262 from non-bacterial origin [43]. Moreover, predicted classes of pili adhesins and AB5 toxins were found  
263 to be exclusive to bacteria. While other lectin classes also appeared to be exclusively predicted in  
264 bacteria, these results are likely to be influenced by the fact that to date, many structurally characterised  
265 and curated lectins represent those of highest abundance in readily culturable bacteria.

266 Subsequent prediction of lectin sequences from the bacterial proteomes identified could be used as a  
267 basis for future identification of therapeutic molecules to specifically target pathogenic bacteria. They  
268 could also have possible interesting specificity to other glycans, but glycan array screenings are  
269 required to have further information. 3D structure crystallisation of new possible lectins is also required  
270 for a better understanding of their variation in the glycan recognition site.

271 Given the increased awareness of the importance of the vaginal microbiome in shaping reproductive  
272 tract health outcomes, we next undertook comparative analyses of predicted lectins derived from  
273 vaginal commensal and pathogenic bacterial isolates. Our analysis, based on 109 structurally  
274 characterised lectin classes, suggests that the common commensal species, *L. crispatus* and *L. gasseri*  
275 only produces LysM, a ubiquitous domain present in almost all bacteria and involved in binding  
276 peptidoglycan with an N-acetylglucosamine specificity [44]. CBM50 is the other denomination of  
277 LysM and is therefore also widespread. CAZy annotations confirm it is involved in binding N-

## Exploring the vaginal lectome

278 acetylglucosamine residues in bacterial peptidoglycans and in chitin. The number of CBMs identified  
279 in these species was also very low and corresponded mainly to domains associated with nutrient-  
280 degrading glycosylhydrolases. These results suggest that *Lactobacillus* species associated with optimal  
281 vaginal microbiome compositions appear to be comparatively ill-equipped for binding mucins. It is  
282 important to note that this observation may be biased because the analysis only involved structurally  
283 characterised lectins. Further, a limited number of other “mucin adhesion factors” have been described  
284 in *Lactobacilli* [45, 46], but except for the fimbriae domain in *L. rhamnosus* (Nishiyama, Ueno et al.  
285 2016), these are in general described as moonlighting proteins, i.e. with adhesion properties being only  
286 a side activity in addition to their main function. A shift from *Lactobacillus* species dominance of the  
287 vaginal niche towards increased bacterial diversity and enrichment of pathobionts is a signature of  
288 vaginal dysbiosis, which has been associated with a range of pathology states including increased risk  
289 of sexually transmitted infections [21] and various poor pregnancy outcomes including miscarriage  
290 [23], prelabour premature rupture of the fetal membranes [24, 47] and preterm birth [25, 26, 48, 49].  
291 We demonstrated here that the strategy for binding mucins appears to be more evolved in vaginal  
292 pathobionts than in commensals, with the former producing a much larger variety of lectins and CBMs.  
293 Consistent with our findings, different species of *Streptococci* have been previously shown to produce  
294 a large number of lectin domains that form integral parts of toxins, adhesins and pilins [50].

295 While *Lactobacillus* species are considered hallmarks of optimal vaginal health, *L. iners* is considered  
296 a marker of a “transitional microbiome” at the crossroads of vaginal health and disease [51, 52]. The  
297 predicted lectomes of the various *L. iners* strains screened were found to contain a significantly larger  
298 number of lectin domains than those in other *Lactobacilli*, and the same observation stands when  
299 analysing CBMs. This is somewhat surprising considering that *L. iners* has a much smaller genome  
300 than other *Lactobacilli* [51]. Several of these identified domains are glycan-specific for glycans present  
301 on human mucins such as sialic-binding domain from SRPPs, galactose-specific pilin domain, as well  
302 as fucose-binding CBMs usually associated with *Streptococci*. This similarity between *L. iners* and  
303 pathogens is in agreement with the previous identification of inerolysin, a pore-forming toxin from *L.*  
304 *iners* also found in *Gardnerella* [53]. Moreover, sequences with similarity to fimbrial proteins PapG  
305 from *E. coli*, and Psa/Myf from *Yersinia pestis* were identified in almost all strains of *L. iners*.  
306 Interestingly, these two adhesins have similar specificity towards  $\alpha$ -galactosylated epitopes [54].

307 The lectome expansion that appears to correlate with the transition towards species involved in vaginal  
308 dysbiosis, raises the question of associated changes in vaginal glycans, and particularly in glyco-  
309 epitopes present on mucins. Mucin glycans have been more characterized in gut and lung, and it has

## Exploring the vaginal lectome

310 been demonstrated that glycosylation is altered in case of inflammation. For example, in cystic fibrosis  
311 patients, inflammation results in an increase in fucosylation and sialylation, favouring the attachment  
312 of opportunistic pathogens such as *Pseudomonas aeruginosa*, which in turn stimulates the  
313 inflammatory process [55]. Such glycan-based processes may occur in the vagina and a deeper  
314 characterisation of mucin glycosylation in this context is needed.

315 While the mechanisms underpinning dynamic shifts in vaginal microbial structure and composition  
316 remain to be fully elucidated, our study provides important new insights into lectin profiles of  
317 commensal and pathogen colonisation of the reproductive tract that are associated with health and  
318 disease states.

319 The screening tools described and used in the present study can be run on any sequence data and reveal  
320 currently concealed information on the content and the role of the lectome. Results show clearly the  
321 emergence of characteristic patterns indicative of pathological states. This may guide the development  
322 of new strategies for novel therapeutics designed to manipulate adhesion and attachment of microbes  
323 to promote optimal colonisation of the lower reproductive tract.

324

## 325 **Materials and Methods**

### 326 **Definition of signature profiles for lectins**

327 A new lectin classification has been recently defined based on structural data and is available in the  
328 UniLectin3D database (<https://unilectin.eu/unilectin3D/>). The classification is built on three levels: 1)  
329 the fold level directly derived from the protein three-dimensional structure that describes the fold  
330 adopted by the whole lectin domain ( $\beta$ -helix,  $\beta$ -propeller and others). The nomenclature on fold are  
331 adopted from the reference structural-based databases, CATH [56] and SCOPe [57] and previous  
332 reports on structural classification of lectins [58]; 2) The class level defined by sequence similarity  
333 with a 20% cut-off between different classes, i.e., lectin sequences in one class are at least 20% similar  
334 to one another; 3) The family level defined at a minimum of 70% of sequence identity. The values of  
335 cut-offs were set in agreement with definitions in the CATH database for the class level, and  
336 empirically for the family level in order to maximise the consistency of each family. The classification  
337 is therefore organized in 35 folds, 109 classes, and 350 families.

338 For each of the 109 lectin classes, UniLectin3D sequences were aligned with the Muscle software [59]  
339 to construct a characteristic motif of conserved residues. Sequence redundancy was automatically

## Exploring the vaginal lectome

340 removed. Manual inspection of characteristic lectin domains led to creating a list of disqualifying  
341 domains such as peptide tags in order to manage future systematic removal. Conserved regions from  
342 the multiple alignments were then fed to a Hidden Markov Modelling tool to generate profiles  
343 characterising each lectin class. The HMMER-hmmbuild tool [60] was used to align each lectin class  
344 multiple sequence alignment against protein sequence datasets, with the sym\_frac parameter at 0.8 to  
345 avoid isolated regions in the conserved motifs.

346

### 347 **Prediction of bacterial lectins in protein databases**

348 Bacterial sequences recorded in UniProtKB [61] and in non-redundant NCBI were processed with  
349 HMMER-hmmsearch, with default parameters and a p-value below  $10^{-2}$ , to run profiles obtained with  
350 HMMER-hmmbuild. Parameters include the BLOSUM62 score matrix for amino acid substitutions  
351 (Eddy 2004). Further filtering was applied to multiple strains of the same species with almost identical  
352 proteins and only a few different amino acids due to natural mutation, sequencing errors, or protein  
353 prediction errors. Post-processing involved keeping only one representative protein for all redundant  
354 proteins (with 100 consecutive amino acids that are identical). Predicted domains with less than 15  
355 amino acids are considered as small fragments.

356 Each sequence match output by the HMMER toolset is evaluated with a quality score that has no upper  
357 boundary. Furthermore, because each family profile is generated independently of one another, quality  
358 scores are not comparable across motifs used for the prediction. This makes it impossible to use a  
359 single cut-off for all lectin classes. Additionally, in the case of tandem repeat domains, the quality score  
360 is proportional to the number of repeats and artificially promotes sequences with repeated domains. To  
361 address these scoring issues, a prediction score for each database hit was defined to give the similarity  
362 between the predicted domain and the reference lectin motif. The amino acid sequence alignment  
363 generated by HMMER during the search is further evaluated: at each position of the alignment, a  
364 cumulative counter is incremented by 1 if amino acids are identical, else by a normalised BLOSUM62  
365 substitution score. The final value of the counter divided by the domain length (i.e., the total number  
366 of positions) results in a value between 0 to 1 that defines the prediction/similarity score. A predicted  
367 lectin may belong to several classes, independently of the prediction score. The prediction/similarity  
368 score is mainly destined to order the information to be displayed on the UniLectin platform for each  
369 predicted lectin. HMMER p-value threshold (better defined than HMMER score) applied before  
370 remains the most reliable parameter for trusting a candidate lectin.



## Exploring the vaginal lectome

371 For each predicted protein, associated annotations are extracted and loaded from UniProt and from the  
372 NCBI. This includes the taxonomy details of the protein and the corresponding ID of the NCBI  
373 taxonomy database. Proteins considered as obsolete in the latest releases of UniProt or in the NCBI,  
374 with no associated metadata, are removed.

375

### 376 **Prediction of lectins and CBMs in the vaginal microbiome**

377 The subset of bacteria corresponding to the vaginal microbiome (S2Table) was identified from genome  
378 database annotations, such as those found in the Bioproject  
379 [www.ncbi.nlm.nih.gov/bioproject/PRJNA316969](http://www.ncbi.nlm.nih.gov/bioproject/PRJNA316969) and from a published list of bacteria [62]. Bacteria  
380 belonging to different species of *Lactobacilli*, *Gardnerella*, *Prevotella*, *E. coli* and Group B  
381 *Streptococci* were selected and classified into commensals or pathobionts on the basis of their potential  
382 pathogenicity within the vaginal niche [63], and their association with states of health and disease  
383 including bacterial vaginosis, preterm birth and risk of acquisition of sexually transmitted infections  
384 [18, 19, 21, 25, 47, 49, 52, 63].

385 The proteome of each strain was downloaded from the NCBI assembly database [64]. The  
386 corresponding sequences were processed to detect lectins and CBMs with the same method of  
387 prediction involving the 109 lectin profiles generated as described above. HMMER-hmmsearch was  
388 run to identify the lectome of each strain's proteome with default parameters and a p-value below  $10^{-2}$   
389 with no further filtering. Proteins producing good quality alignments (HMM score > 50) with HMMER  
390 during the analysis of amino acid sequences were directly tagged as lectin domains. For lesser quality  
391 alignments the "Align Sequences Protein BLAST" component of the BlastP tool (ref) was used with  
392 default parameters to align a predicted domain against the closest reference lectin with a defined 3D  
393 structure. Manual quality checks, especially focused on the glycan binding pocket, were carried out to  
394 verify the amino acid conservation and ensure the quality of the predicted lectin.

395 HMM profiles of Carbohydrate-binding modules (CBMs) were extracted from dbCAN2, a web server  
396 for the identification of carbohydrate-active enzymes [65]. The HMM profiles provided by dbCAN2  
397 are based on CAZy CBM sequence data [66]. These profiles were used to identify 1777 proteins from  
398 the predicted proteomes of the vaginal commensals and pathobionts. Following removal of high  
399 frequency influenza-like predicted lectins and CBD domains occurring in less than three strains, the  
400 resulting data was grouped by domain clustering to reflect compositional similarities. The remaining  
401 CBMs were associated with their matching glycans and additional information (S3 Table).

## Exploring the vaginal lectome

402 To reinforce the results influenza-like predicted lectins are removed (the high frequency of this domain  
403 is misleading, as mentioned earlier) and the lectin and CBM domains occurring in less than three strains  
404 were filtered out (removing 20 lectin classes and 15 CBM domains for a total of 50 proteins).

405

### 406 **Statistical software**

407 Predicted lectins in the HMMER output format were formatted into a tabulated matrix flat file by a  
408 python parser and loaded in R for statistical analysis. The following libraries were used:

- 409 1. Graphics were generated with R libraries of the Comprehensive R Archive Network (CRAN)  
410 including the *d3heatmap* package for heatmaps
- 411 2. Hierarchical clustering: The Ward's minimum variance method part of the *hclust* R package  
412 was used to process a Euclidean distance matrix of the number of predicted proteins per  
413 species for each domain
- 414 3. GGplot2 and the APE (Analyses of Phylogenetics and Evolution) package for the hierarchical  
415 tree. In this case, prior clustering was applied to the data with the complete linkage method of  
416 the *hclust* R package. A Euclidean distance matrix of the number of predicted proteins per  
417 species for each domain was input.

418 For the sake of simplicity, lectins occurring in at least two strains are represented and the Influenza  
419 domain is filtered out for the lectin heatmap; and in at least 3 strains for the lectin and CBM heatmap.  
420 When lectins and CBMs are represented together the domains present in at least three strains are  
421 considered. The lectin and CBM specificity for glycans was manually recovered using UniLectin3D  
422 database and CAZy database annotations. Only predicted bacterial lectins with a score greater than  
423 0.25 are kept.

424

### 425 **Acknowledgments**

426 The authors acknowledge support by the ANR PIA Glyco@Alps (ANR-15-IDEX-02), Alliance  
427 Campus Rhodanien Co-Funds (<http://campusrhodanien.unige-cofunds.ch>), Labex Arcane/CBH-EUR-  
428 GS (ANR-17-EURE-0003) and the March of Dimes.

429

430

431 **References**

- 432 1. Cho I, Blaser MJ. The human microbiome: at the interface of health and disease. *Nat Rev Genet.*  
433 2012;13(4):260-70.
- 434 2. Thornton DJ, Rousseau K, McGuckin MA. Structure and function of the polymeric mucins in  
435 airways mucus. *Annu Rev Physiol.* 2008;70:459-86.
- 436 3. Tailford LE, Crost EH, Kavanaugh D, Juge N. Mucin glycan foraging in the human gut  
437 microbiome. *Front Genet.* 2015;6:81.
- 438 4. Corfield AP. The Interaction of the Gut Microbiota with the Mucus Barrier in Health and  
439 Disease in Human. *Microorganisms.* 2018;6(3).
- 440 5. Etzold S, Juge N. Structural insights into bacterial recognition of intestinal mucins. *Curr Opin*  
441 *Struct Biol.* 2014;28:23-31.
- 442 6. Ficko-Blean E, Boraston AB. Insights into the recognition of the human glycome by microbial  
443 carbohydrate-binding modules. *Curr Opin Struct Biol.* 2012;22(5):570-7.
- 444 7. Lis H, Sharon N. Lectins: Carbohydrate-specific proteins that mediate cellular recognition.  
445 *Chem Rev.* 1998;98(2):637-74.
- 446 8. Lepenies B, Lang R. Editorial: Lectins and Their Ligands in Shaping Immune Responses. *Front*  
447 *Immunol.* 2019;10:2379.
- 448 9. Moonens K, Remaut H. Evolution and structural dynamics of bacterial glycan binding adhesins.  
449 *Curr Opin Struct Biol.* 2017;44:48-58.
- 450 10. Merritt EA, Hol WGJ. AB5 toxins. *Curr Opin Struct Biol.* 1995;5:165-71.
- 451 11. Imberty A, Mitchell EP, Wimmerová M. Structural basis for high affinity glycan recognition by  
452 bacterial and fungal lectins. *Curr Opin Struct Biol.* 2005;15:525-34.
- 453 12. Eierhoff T, Bastian B, Thuenauer R, Madl J, Audfray A, Aigal S, et al. A lipid zipper triggers  
454 bacterial invasion. *Proc Natl Acad Sci U S A.* 2014;111:12895-900.
- 455 13. Fazli M, Almblad H, Rybtke ML, Givskov M, Eberl L, Tolker-Nielsen T. Regulation of biofilm  
456 formation in *Pseudomonas* and *Burkholderia* species. *Environ Microbiol.* 2014;16(7):1961-81.
- 457 14. Iliev ID, Funari VA, Taylor KD, Nguyen Q, Reyes CN, Strom SP, et al. Interactions between  
458 commensal fungi and the C-type lectin receptor Dectin-1 influence colitis. *Science.*  
459 2012;336(6086):1314-7.
- 460 15. Pang X, Xiao X, Liu Y, Zhang R, Liu J, Liu Q, et al. Mosquito C-type lectins maintain gut  
461 microbiome homeostasis. *Nat Microbiol.* 2016;1:16023.
- 462 16. Cross BW, Ruhl S. Glycan recognition at the saliva - oral microbiome interface. *Cell Immunol.*  
463 2018;333:19-33.
- 464 17. MacIntyre DA, Sykes L, Bennett PR. The human female urogenital microbiome: complexity in  
465 normality. *Emerging Topics in Life Sciences.* 2017;1(4):363-72.
- 466 18. Ma B, Forney LJ, Ravel J. Vaginal microbiome: rethinking health and disease. *Annu Rev*  
467 *Microbiol.* 2012;66:371-89.
- 468 19. van de Wiggert JH, Borgdorff H, Verhelst R, Crucitti T, Francis S, Verstraelen H, et al. The  
469 vaginal microbiota: what have we learned after a decade of molecular characterization? *PLoS*  
470 *One.* 2014;9(8):e105998.

## Exploring the vaginal lectome

- 471 20. Reimers LL, Mehta SD, Massad LS, Burk RD, Xie X, Ravel J, et al. The Cervicovaginal  
472 Microbiota and Its Associations With Human Papillomavirus Detection in HIV-Infected and  
473 HIV-Uninfected Women. *J Infect Dis.* 2016;214(9):1361-9.
- 474 21. Borgdorff H, Tsvitshivadze E, Verhelst R, Marzorati M, Jurriaans S, Ndayisaba GF, et al.  
475 *Lactobacillus*-dominated cervicovaginal microbiota associated with reduced HIV/STI prevalence  
476 and genital HIV viral load in African women. *ISME J.* 2014;8(9):1781-93.
- 477 22. Mitra A, MacIntyre DA, Ntritsos G, Smith A, Tsilidis KK, Marchesi JR, et al. The vaginal  
478 microbiota associates with the regression of untreated cervical intraepithelial neoplasia 2 lesions.  
479 *Nat Commun.* 2020;11(1):1999.
- 480 23. Al-Memar M, Bobdiwala S, Fourie H, Manino R, Lee YS, Smith A, et al. The association  
481 between vaginal bacterial composition and miscarriage: a nested case-control study. *BJOG.*  
482 2019.
- 483 24. Brown RG, Al-Memar M, Marchesi JR, Lee YS, Smith A, Chan D, et al. Establishment of  
484 vaginal microbiota composition in early pregnancy and its association with subsequent preterm  
485 prelabor rupture of the fetal membranes. *Transl Res.* 2019;207:30-43.
- 486 25. Fettweis JM, Serrano MG, Brooks JP, Edwards DJ, Girerd PH, Parikh HI, et al. The vaginal  
487 microbiome and preterm birth. *Nat Med.* 2019;25(6):1012-21.
- 488 26. Kindinger LM, MacIntyre DA, Lee YS, Marchesi JR, Smith A, McDonald JA, et al.  
489 Relationship between vaginal microbial dysbiosis, inflammation, and pregnancy outcomes in  
490 cervical cerclage. *Sci Transl Med.* 2016;8(350):350ra102.
- 491 27. Gipson IK. Mucins of the human endocervix. *Front Biosci.* 2001;6:D1245-55.
- 492 28. Wiggins R, Hicks SJ, Soothill PW, Millar MR, Corfield AP. Mucinases and sialidases: their role  
493 in the pathogenesis of sexually transmitted infections in the female genital tract. *Sexually*  
494 *Transmitted Infections.* 2001;77(6):402-8.
- 495 29. Kilian M, Reinholdt J, Lomholt H, Poulsen K, Frandsen EVG. Biological significance of IgA1  
496 proteases in bacterial colonization and pathogenesis: Critical evaluation of experimental  
497 evidence. *Apmis.* 1996;104(5):321-38.
- 498 30. Robertson JA, Stemler ME, Stemke GW. Immunoglobulin-a Protease Activity of *Ureaplasma*-  
499 *Urealyticum*. *Journal of Clinical Microbiology.* 1984;19(2):255-8.
- 500 31. Coombs GH, North MJ. An Analysis of the Proteinases of *Trichomonas-Vaginalis* by  
501 Polyacrylamide-Gel Electrophoresis. *Parasitology.* 1983;86(Feb):1-6.
- 502 32. Cauci S, Monte R, Driussi S, Lanzafame P, Quadrifoglio F. Impairment of the mucosal immune  
503 system: IgA and IgM cleavage detected in vaginal washings of a subgroup of patients with  
504 bacterial vaginosis. *J Infect Dis.* 1998;178(6):1698-706.
- 505 33. Vornhagen J, Quach P, Boldenow E, Merillat S, Whidbey C, Ngo LY, et al. Bacterial  
506 Hyaluronidase Promotes Ascending GBS Infection and Preterm Birth. *MBio.* 2016;7(3).
- 507 34. Carlin AF, Uchiyama S, Chang YC, Lewis AL, Nizet V, Varki A. Molecular mimicry of host  
508 sialylated glycans allows a bacterial pathogen to engage neutrophil Siglec-9 and dampen the  
509 innate immune response. *Blood.* 2009;113(14):3333-6.
- 510 35. Mariethoz J, Alocci D, Gastaldello A, Horlacher O, Gasteiger E, Rojas-Macias M, et al.  
511 Glycomics@ExPASy: Bridging the gap. *Mol Cell Proteomics.* 2018.

## Exploring the vaginal lectome

- 512 36. Mariethoz J, Khatib K, Alocci D, Campbell MP, Karlsson NG, Packer NH, et al. SugarBindDB,  
513 a resource of glycan-mediated host-pathogen interactions. *Nucleic Acids Research*.  
514 2016;44(D1):D1243-50.
- 515 37. Bonnardel F, Mariethoz J, Salentin S, Robin X, Schroeder M, Perez S, et al. UniLectin3D, a  
516 database of carbohydrate binding proteins with curated information on 3D structures and  
517 interacting ligands. *Nucleic Acids Research*. 2019;47:D1236–D44.
- 518 38. Sehnal D, Deshpande M, Varekova RS, Mir S, Berka K, Midlik A, et al. LiteMol suite:  
519 interactive web-based visualization of large-scale macromolecular structure data. *Nature*  
520 *Methods*. 2017;14(12):1121-2.
- 521 39. Neelamegham S, Aoki-Kinoshita K, Bolton E, Frank M, Lisacek F, Lutteke T, et al. Updates to  
522 the Symbol Nomenclature for Glycans guidelines. *Glycobiology*. 2019;29(9):620-4.
- 523 40. Boraston AB, Ficko-Blean E, Healey M. Carbohydrate recognition by a large sialidase toxin  
524 from *Clostridium perfringens*. *Biochemistry*. 2007;46(40):11352-60.
- 525 41. Vasta GR, Amzel LM, Bianchet MA, Cammarata M, Feng C, Saito K. F-Type Lectins: A Highly  
526 Diversified Family of Fucose-Binding Proteins with a Unique Sequence Motif and Structural  
527 Fold, Involved in Self/Non-Self-Recognition. *Front Immunol*. 2017;8:1648.
- 528 42. Montanier C, Flint JE, Bolam DN, Xie H, Liu Z, Rogowski A, et al. Circular permutation  
529 provides an evolutionary link between two families of calcium-dependent carbohydrate binding  
530 modules. *J Biol Chem*. 2010;285(41):31742-54.
- 531 43. Loris R. Principles of structures of animal and plant lectins. *Biochim Biophys Acta*.  
532 2002;1572(2-3):198-208.
- 533 44. Mesnage S, Dellarole M, Baxter NJ, Rouget JB, Dimitrov JD, Wang N, et al. Molecular basis for  
534 bacterial peptidoglycan recognition by LysM domains. *Nat Commun*. 2014;5:4269.
- 535 45. Nishiyama K, Sugiyama M, Mukai T. Adhesion Properties of Lactic Acid Bacteria on Intestinal  
536 Mucin. *Microorganisms*. 2016;4(3).
- 537 46. Velez MP, De Keersmaecker SC, Vanderleyden J. Adherence factors of *Lactobacillus* in the  
538 human gastrointestinal tract. *FEMS Microbiol Lett*. 2007;276(2):140-8.
- 539 47. Brown RG, Marchesi JR, Lee YS, Smith A, Lehne B, Kindinger LM, et al. Vaginal dysbiosis  
540 increases risk of preterm fetal membrane rupture, neonatal sepsis and is exacerbated by  
541 erythromycin. *BMC Med*. 2018;16(1):9.
- 542 48. Vaneechoutte M. The human vaginal microbial community. *Res Microbiol*. 2017;168(9-10):811-  
543 25.
- 544 49. Kindinger LM, Bennett PR, Lee YS, Marchesi JR, Smith A, Cacciatore S, et al. The interaction  
545 between vaginal microbiota, cervical length, and vaginal progesterone treatment for preterm  
546 birth risk. *Microbiome*. 2017;5(1):6.
- 547 50. Moschioni M, Pansegrau W, Barocchi MA. Adhesion determinants of the *Streptococcus* species.  
548 *Microb Biotechnol*. 2010;3(4):370-88.
- 549 51. Macklaim JM, Gloor GB, Anukam KC, Cribby S, Reid G. At the crossroads of vaginal health  
550 and disease, the genome sequence of *Lactobacillus iners* AB-1. *Proc Natl Acad Sci U S A*.  
551 2011;108 Suppl 1:4688-95.
- 552 52. Petrova MI, Reid G, Vaneechoutte M, Lebeer S. *Lactobacillus iners*: Friend or Foe? *Trends*  
553 *Microbiol*. 2017;25(3):182-91.

## Exploring the vaginal lectome

- 554 53. Rampersaud R, Planet PJ, Randis TM, Kulkarni R, Aguilar JL, Lehrer RI, et al. Inerolysin, a  
555 cholesterol-dependent cytolysin produced by *Lactobacillus iners*. *J Bacteriol.* 2011;193(5):1034-  
556 41.
- 557 54. Kline KA, Falker S, Dahlberg S, Normark S, Henriques-Normark B. Bacterial adhesins in host-  
558 microbe interactions. *Cell Host Microbe.* 2009;5(6):580-92.
- 559 55. Cott C, Thuenauer R, Landi A, Kühn K, Juillot S, Imberty A, et al. *Pseudomonas aeruginosa*  
560 lectin LecB inhibits tissue repair processes by triggering beta-catenin degradation. *BBA -*  
561 *Molecular Cell Research.* 2016;1863:1106-18.
- 562 56. Dawson NL, Sillitoe I, Lees JG, Lam SD, Orengo CA. CATH-Gene3D: Generation of the  
563 resource and its use in obtaining structural and functional annotations for protein sequences.  
564 *Methods Mol Biol.* 2017;1558:79-110.
- 565 57. Andreeva A, Kulesha E, Gough J, Murzin AG. The SCOP database in 2020: expanded  
566 classification of representative family and superfamily domains of known protein structures.  
567 *Nucleic Acids Res.* 2020;48(D1):D376-D82.
- 568 58. Fujimoto Z, Tateno H, Hirabayashi J. Lectin structures: classification based on the 3-D  
569 structures. *Methods Mol Biol.* 2014;1200:579-606.
- 570 59. Edgar RC. MUSCLE: multiple sequence alignment with high accuracy and high throughput.  
571 *Nucleic Acids Res.* 2004;32(5):1792-7.
- 572 60. Potter SC, Luciani A, Eddy SR, Park Y, Lopez R, Finn RD. HMMER web server: 2018 update.  
573 *Nucleic Acids Res.* 2018;46(W1):W200-W4.
- 574 61. UniProt C. UniProt: a worldwide hub of protein knowledge. *Nucleic Acids Res.*  
575 2019;47(D1):D506-D15.
- 576 62. Thomas-White K, Forster SC, Kumar N, Van Kuiken M, Putonti C, Stares MD, et al. Culturing  
577 of female bladder bacteria reveals an interconnected urogenital microbiota. *Nat Commun.*  
578 2018;9(1):1557.
- 579 63. van de Wijkert J, Verwijs MC, Gill AC, Borgdorff H, van der Veer C, Mayaud P. Pathobionts in  
580 the Vaginal Microbiota: Individual Participant Data Meta-Analysis of Three Sequencing Studies.  
581 *Front Cell Infect Microbiol.* 2020;10:129.
- 582 64. Kitts PA, Church DM, Thibaud-Nissen F, Choi J, Hem V, Sapojnikov V, et al. Assembly: a  
583 resource for assembled genomes at NCBI. *Nucleic Acids Res.* 2016;44(D1):D73-80.
- 584 65. Zhang H, Yohe T, Huang L, Entwistle S, Wu P, Yang Z, et al. dbCAN2: a meta server for  
585 automated carbohydrate-active enzyme annotation. *Nucleic Acids Res.* 2018;46(W1):W95-  
586 W101.
- 587 66. Lombard V, Golaconda Ramulu H, Drula E, Coutinho PM, Henrissat B. The carbohydrate-active  
588 enzymes database (CAZy) in 2013. *Nucleic Acids Research.* 2014;42(Database issue):D490-5.
- 589
- 590
- 591

## Exploring the vaginal lectome

### 592 **Supporting information captions**

593

594 **S1 Table** : List of lectin classes identified from Unilectin3D and used in the classification

595 **S2 Table.** List of the species and strains used in the study

596 **S3 Table.** CBMs of interest for the present study with associated glycan specificity

597

598

599 .
